# Supplementary material for: Fabrication of a magnetite/diazonium functionalized-reduced graphene oxide hybrid as an easily regenerated adsorbent for efficient removal of chlorophenols from aqueous solution
Source: Royal Society of Chemistry journal article supplement (doi:10.1039/c8ra00503f), 2018-01-01
Supplement: c8ra00503f1.pdf [file c8ra00503f1.pdf]

## Supporting Information

### **Fabrication of magnetite/diazonium functionalized-reduced graphene oxide hybrid as an easily regenerative adsorbent for efficient removal of chlorophenols from aqueous solution**

Xiaoqin Shen<sup>a</sup>, Xiaolei Chen<sup>b</sup>, Dejun Sun<sup>b</sup>, Tao Wu<sup>b,\*</sup>, and Yujiang Li<sup>a,\*</sup>

*<sup>a</sup>Shandong Provincial Research Center for Water Pollution Control, School of Environmental Science & Engineering, Shandong University, Jinan, 250100, PR China*

*<sup>b</sup>Key Laboratory of Colloid & Interface Science of Education Ministry, Shandong University, Jinan, 250100, PR China*

Correspondence to either author:

\* Tao Wu: Tel/Fax: +86-531-88365437; E-mail: wutao@sdu.edu.cn.

\* Yujiang Li: Tel/Fax: +86-531-88363358; E-mail: yujiang@sdu.edu.cn.

## Appendix A. Supplementary data

**Table S1.** Freundlich isotherm parameters for adsorption of CPs onto M-DF-RGO at 298 K.

| Phenolics                       | Adsorbents | Freundlich |                                                                 |      |
|---------------------------------|------------|------------|-----------------------------------------------------------------|------|
|                                 |            | $R^2$      | $K_F$<br>$\text{mg}^{1-n} \cdot \text{L}^n \cdot \text{g}^{-1}$ | n    |
| 4-chlorophenol<br>(4-CP)        | M-DF-RGO   | 0.9896     | 3.270                                                           | 1.54 |
| 2,4-dichlorophenol<br>(2,4-DCP) | M-DF-RGO   | 0.9885     | 2.693                                                           | 1.78 |

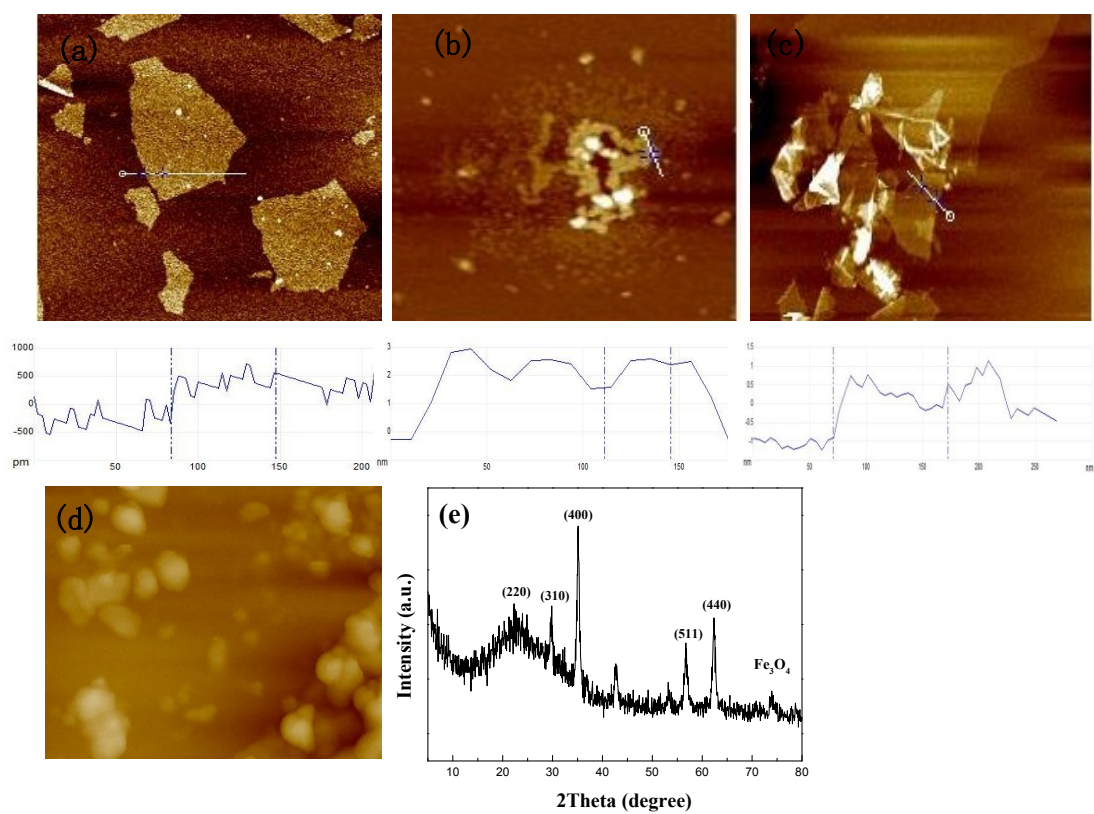

**Fig S1.** AFM images of (a) GO, (b) RGO, (c) DF-RGO, (d) M-DF-RGO, and (e) XRD spectra of Fe<sub>3</sub>O<sub>4</sub>.

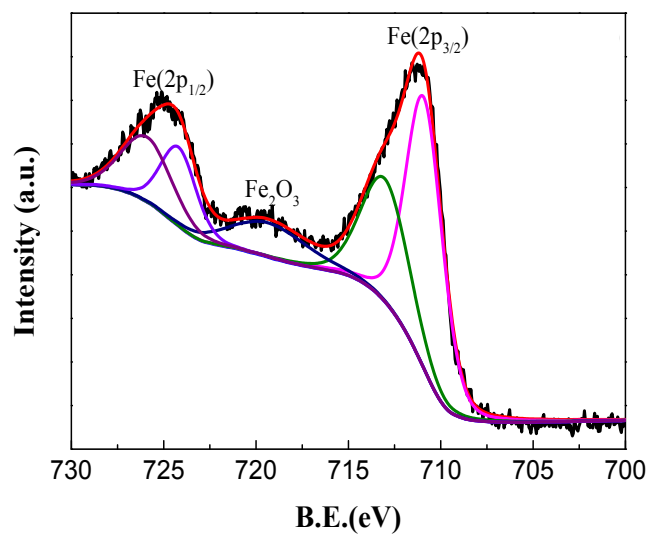

**Figure S2.** High resolution Fe 2p core level XPS spectrum of M-DF-RGO.

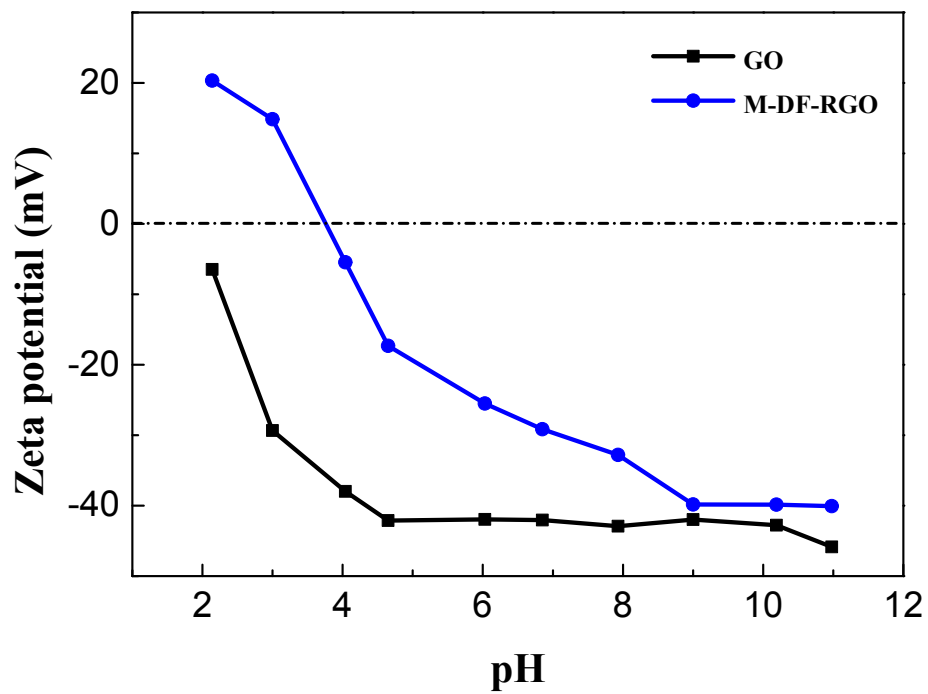

**Figure S3.** Zeta potential of GO, and M-DF-RGO as a function of pH.

## Theoretical Calculations

The diazonium functionalized-reduced graphene oxide is constructed by a *p*-carboxyphenyl group at the plane of graphene, and the graphene model is built by the unit cell parameters of  $a = b = 2.460 \text{ \AA}$ ,  $c = 162.6800 \text{ \AA}$ ;  $\alpha = \beta = 90^\circ$ ,  $\gamma = 120^\circ$ , and a  $5 \times 4$  supercell was built.

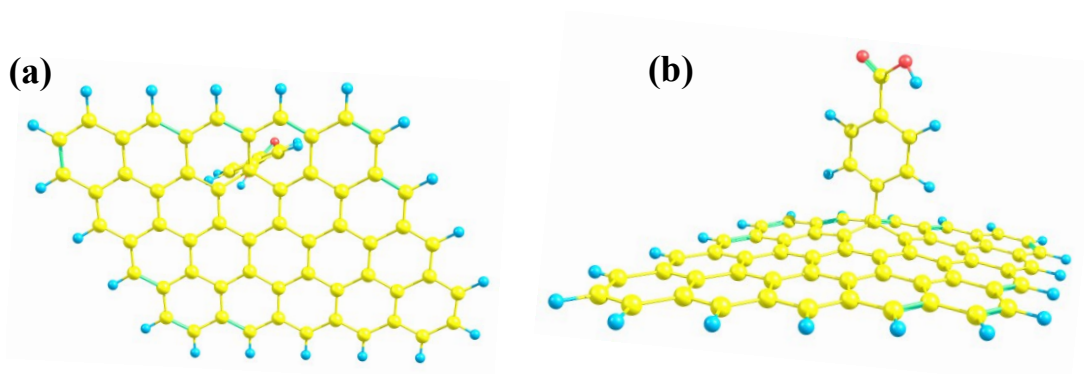

**Figure S4.** Molecular models of DF-RGO (carbon atom: yellow; oxygen atom: red; hydrogen atom: blue): (a) top view, and (b) side view.

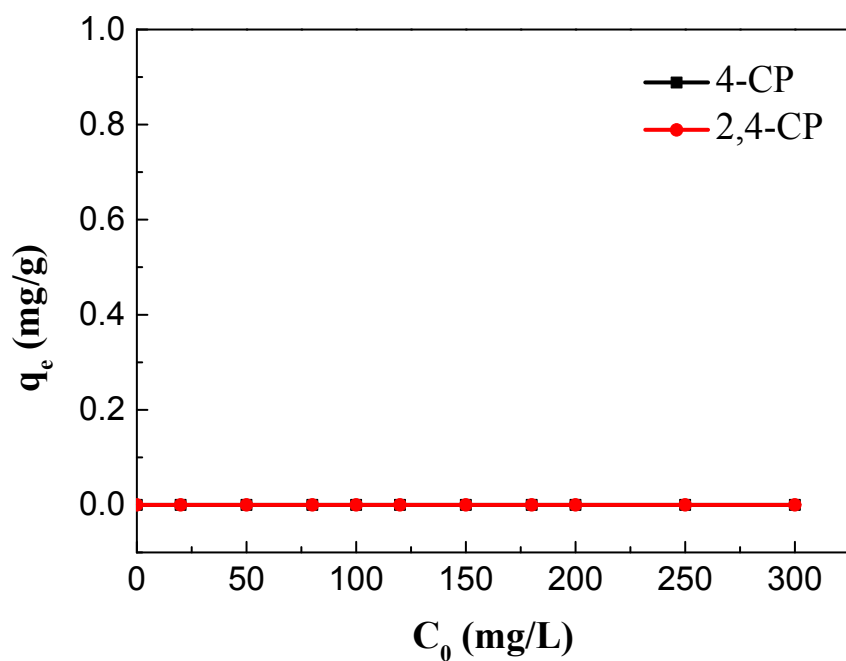

**Figure S5.** Chlorophenols uptakes of  $\text{Fe}_3\text{O}_4$  nanoparticles (experimental conditions: initial chlorophenols concentration = 0-300 mg/L, pH = 6,  $\text{Fe}_3\text{O}_4$  dosage = 1.0 g/L, contact time = 12 h at 298 K).
